# Supplementary material for: Immunoprofiling Correlates of Protection Against SHIV Infection in Adjuvanted HIV-1 Pox-Protein Vaccinated Rhesus Macaques
Source: PubMed Central journal article supplement (PMC8144500; doi:10.3389/fimmu.2021.625030), 2021-05-11
Supplement: DataSheet_1.pdf [file DataSheet_1.pdf]

# Supplementary Material

## Supplementary Figures

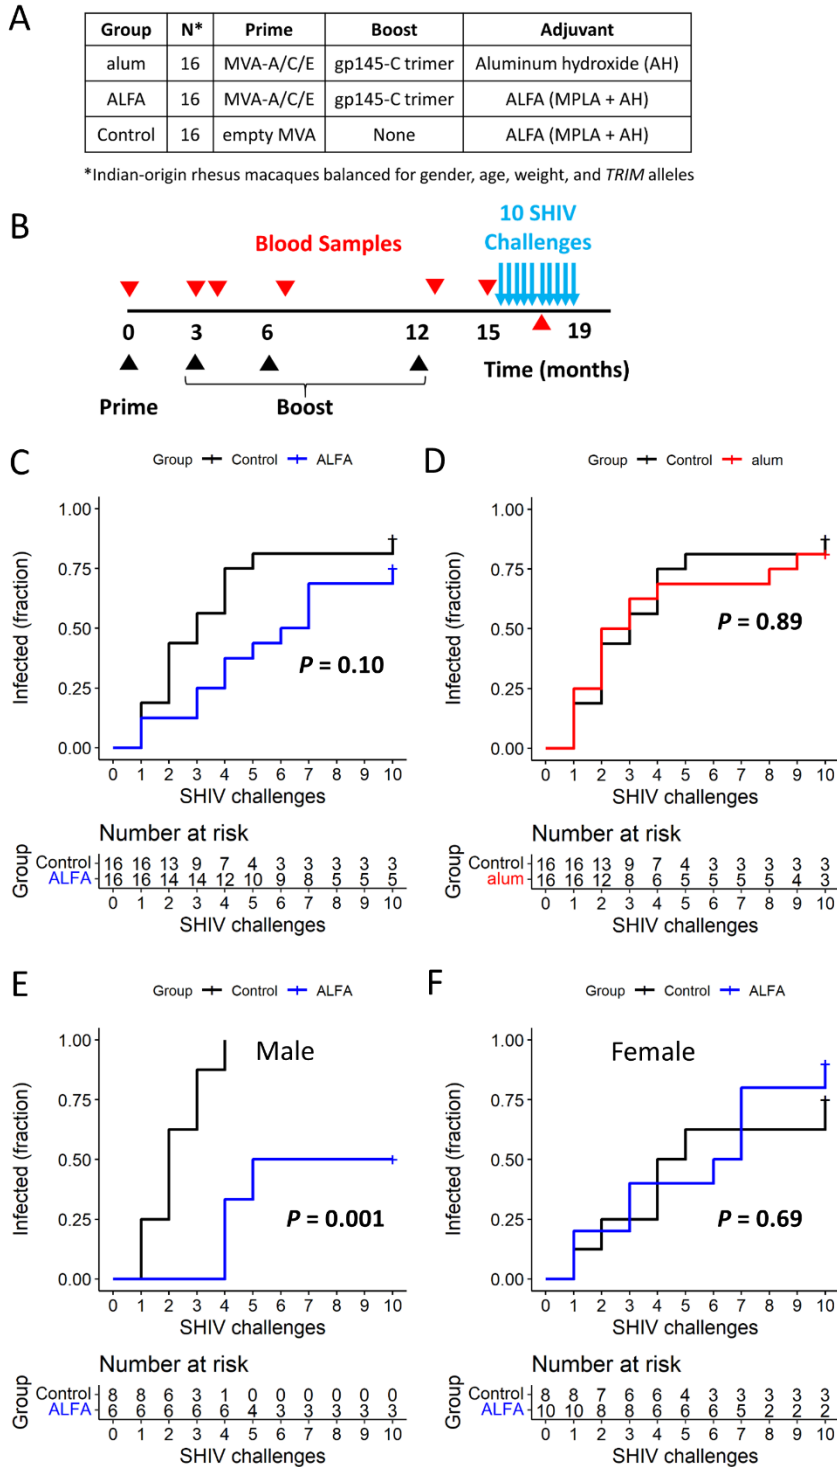

**Supplementary Figure 1. Study design and SHIV challenge outcome.** (A) Study arms and vaccine regimens. (B) Study design and schedule. (C-D) SHIV infection acquisition curves displayed separately for alum and ALFA arms. (E-F) SHIV infection acquisition curves displayed separately for male and female subjects in the ALFA arm.
